# Supplementary material for: Ribonucleotide reductase small subunit M2 is a master driver of aggressive prostate cancer
Source: PubMed Central journal article supplement (PMC7400792; doi:10.1002/1878-0261.12706), 2020-05-31

**Figure S2**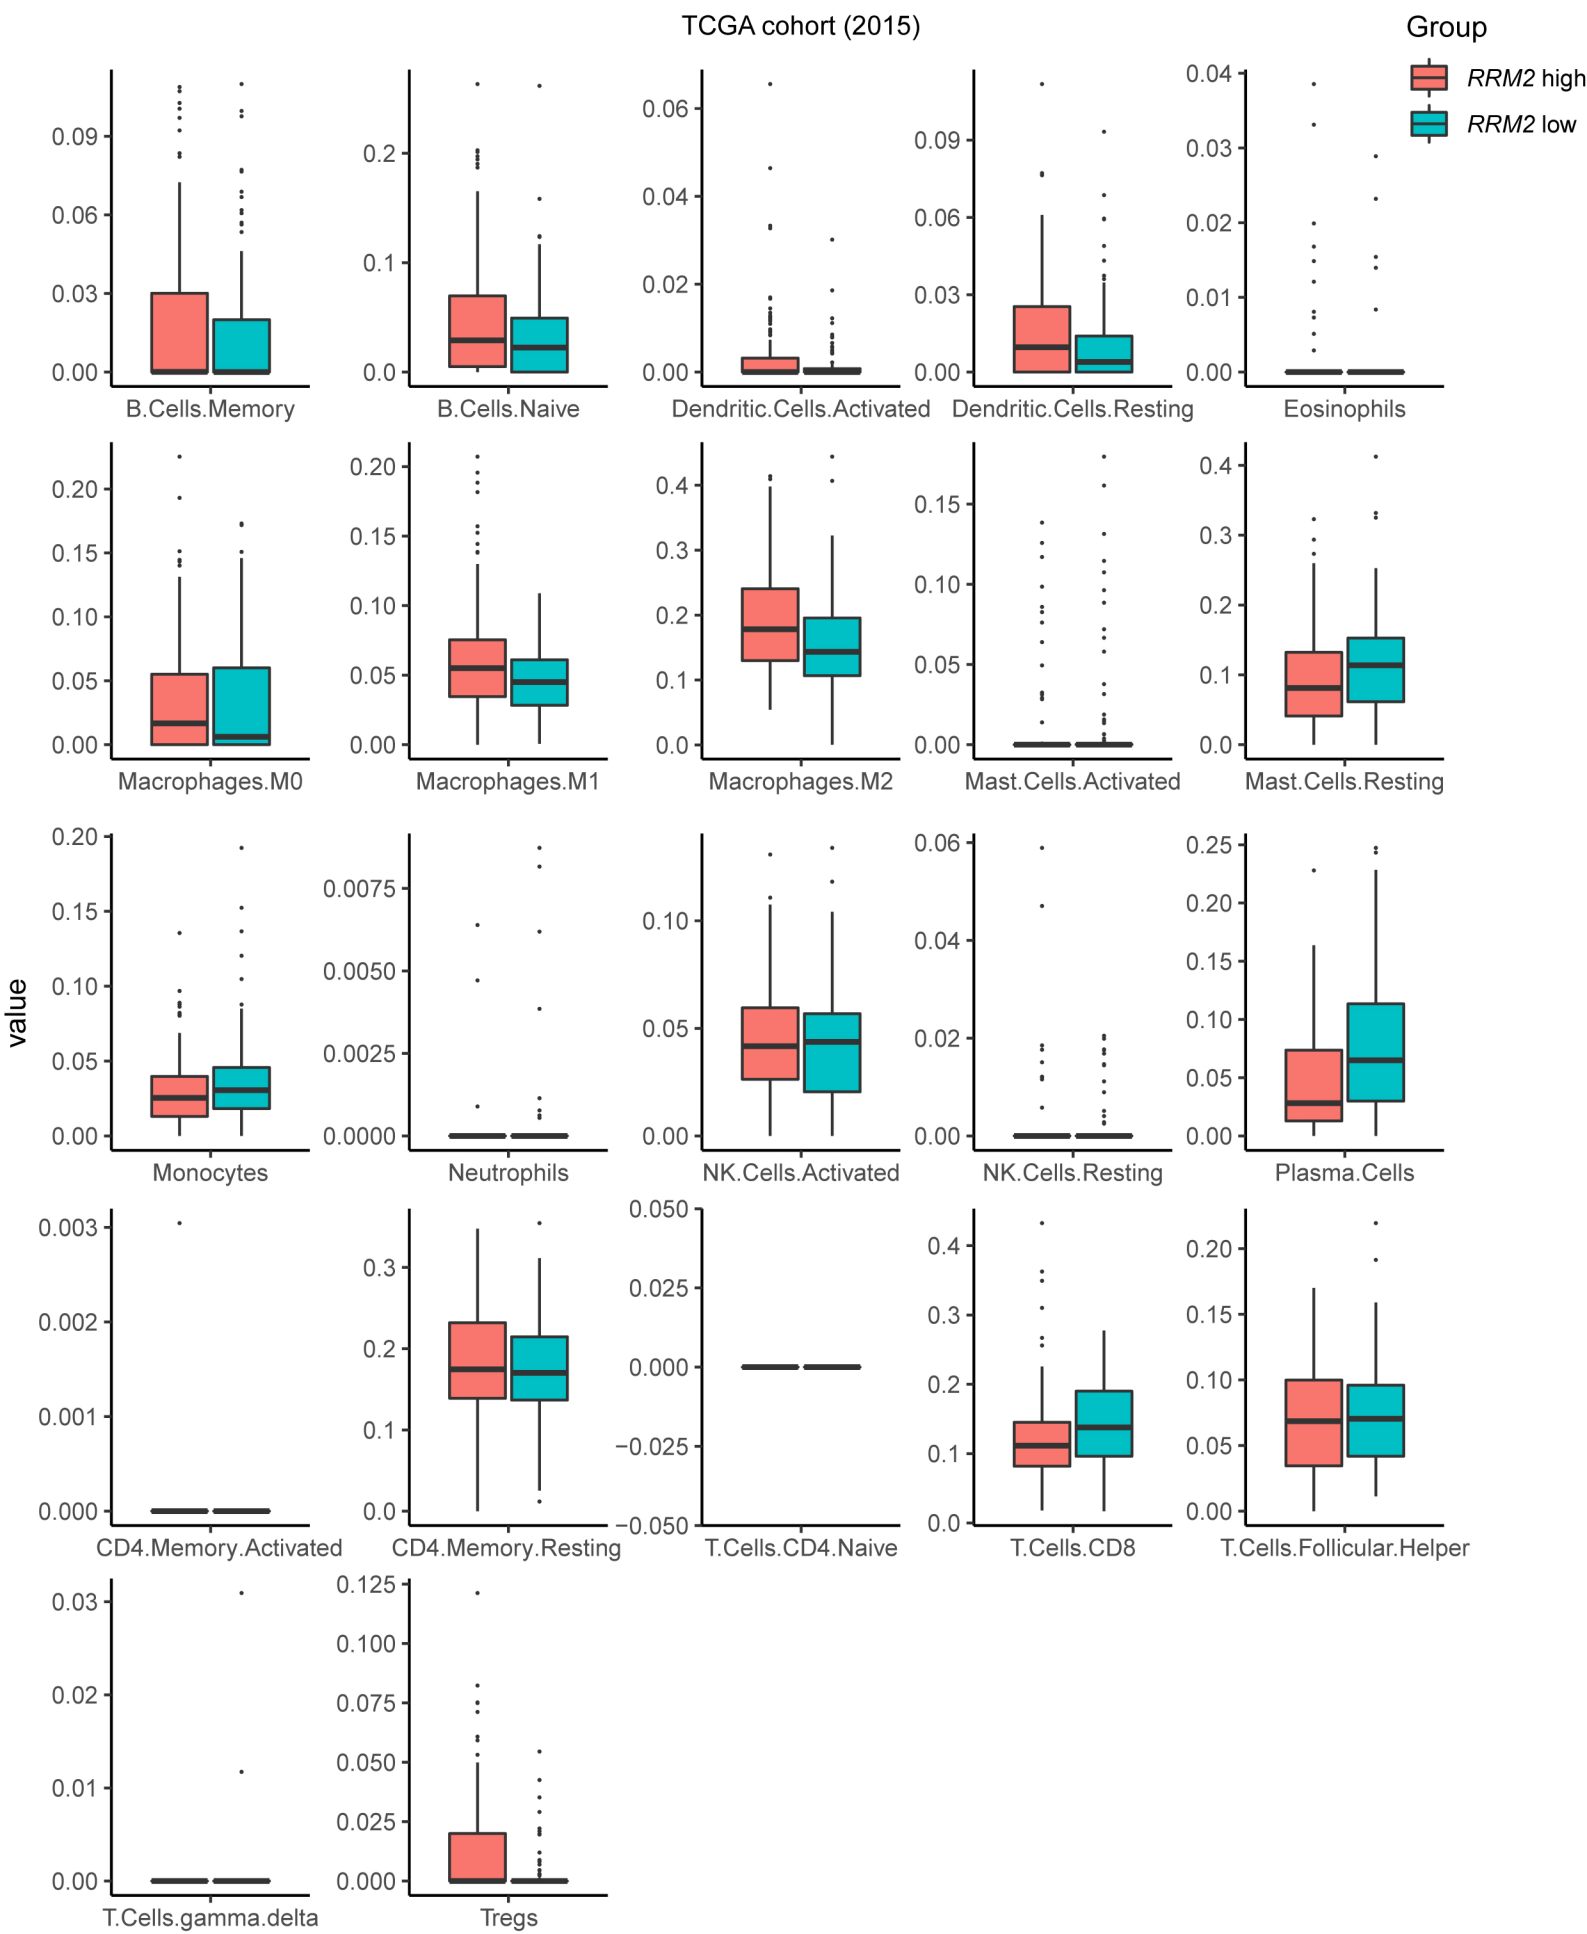

Supplement: MOL2-14-1881-s002.pdf [file MOL2-14-1881-s002.pdf]
