# Supplementary material for: Ribonucleotide reductase small subunit M2 is a master driver of aggressive prostate cancer
Source: PubMed Central journal article supplement (PMC7400792; doi:10.1002/1878-0261.12706), 2020-05-31
Supplement: MOL2-14-1881-s005.pdf [file MOL2-14-1881-s005.pdf]

**Table S1.** Genes in the RRM2 signature and derived sub-signatures. The list of genes that comprise each signature.

| RRM2 signature <sup>(a)</sup> |                 | RRM2/PCS1 <sup>(b)</sup> | PCS1/PAM50 <sup>(c)</sup> | RRM2/PCS1/<br>PAM50 <sup>(d)</sup> | RRM2/CTCs <sup>(e)</sup> |
|-------------------------------|-----------------|--------------------------|---------------------------|------------------------------------|--------------------------|
| 126-gene panel                |                 | 50-gene panel            | 14-gene panel             | 12-gene panel                      | 11-gene panel            |
| <i>ANLN</i>                   | <i>KIF18B</i>   | <i>ANLN</i>              | <i>ANLN</i>               | <i>ANLN</i>                        | <i>AURKB</i>             |
| <i>ARL6IP1</i>                | <i>KIF20A</i>   | <i>AURKA</i>             | <i>BIRC5</i>              | <i>BIRC5</i>                       | <i>CCNB2</i>             |
| <i>ASF1B</i>                  | <i>KIF20B</i>   | <i>BIRC5</i>             | <i>CCNB1</i>              | <i>CCNB1</i>                       | <i>CDKN3</i>             |
| <i>ATAD2</i>                  | <i>KIF23</i>    | <i>BUB1</i>              | <i>CDC20</i>              | <i>CDC20</i>                       | <i>CENPF</i>             |
| <i>ATAD5</i>                  | <i>KIF2C</i>    | <i>BUB1B</i>             | <i>CDC6</i>               | <i>CDC6</i>                        | <i>FANCI</i>             |
| <i>AUNIP</i>                  | <i>KIF4A</i>    | <i>CCNA2</i>             | <i>CENPF</i>              | <i>CENPF</i>                       | <i>KIF11</i>             |
| <i>AURKA</i>                  | <i>KPNA2</i>    | <i>CCNB1</i>             | <i>CEP55</i>              | <i>CEP55</i>                       | <i>KIF2C</i>             |
| <i>AURKB</i>                  | <i>MAD2L1</i>   | <i>CCNB2</i>             | <i>KIF2C</i>              | <i>KIF2C</i>                       | <i>MIS18A</i>            |
| <i>BIRC5</i>                  | <i>MELK</i>     | <i>CDC20</i>             | <i>MELK</i>               | <i>MELK</i>                        | <i>MKI67</i>             |
| <i>BLM</i>                    | <i>MIS18A</i>   | <i>CDC6</i>              | <i>MKI67</i>              | <i>MKI67</i>                       | <i>PIIF</i>              |
| <i>BORA</i>                   | <i>MIS18BP1</i> | <i>CDCA5</i>             | <i>PTTG1</i>              | <i>PTTG1</i>                       | <i>TPX2</i>              |
| <i>BUB1</i>                   | <i>MKI67</i>    | <i>CDCA8</i>             | <i>TYMS</i>               | <i>UBE2T</i>                       |                          |
| <i>BUB1B</i>                  | <i>MNS1</i>     | <i>CDK1</i>              | <i>UBE2C</i>              |                                    |                          |
| <i>CCNA2</i>                  | <i>MYBL2</i>    | <i>CDKN3</i>             | <i>UBE2T</i>              |                                    |                          |
| <i>CCNB1</i>                  | <i>NCAPG</i>    | <i>CENPE</i>             |                           |                                    |                          |
| <i>CCNB2</i>                  | <i>NCAPG2</i>   | <i>CENPF</i>             |                           |                                    |                          |
| <i>CCNE1</i>                  | <i>NCAPH</i>    | <i>CENPM</i>             |                           |                                    |                          |
| <i>CDC20</i>                  | <i>NUF2</i>     | <i>CEP55</i>             |                           |                                    |                          |
| <i>CDC6</i>                   | <i>NUSAP1</i>   | <i>CIT</i>               |                           |                                    |                          |
| <i>CDCA3</i>                  | <i>ORC1</i>     | <i>CKS2</i>              |                           |                                    |                          |
| <i>CDCA5</i>                  | <i>PARP2</i>    | <i>EZH2</i>              |                           |                                    |                          |
| <i>CDCA8</i>                  | <i>PBK</i>      | <i>HJURP</i>             |                           |                                    |                          |
| <i>CDK1</i>                   | <i>PCLAF</i>    | <i>HMGB2</i>             |                           |                                    |                          |
| <i>CDKN3</i>                  | <i>PIF1</i>     | <i>HMMR</i>              |                           |                                    |                          |
| <i>CDT1</i>                   | <i>PIGA</i>     | <i>KIF11</i>             |                           |                                    |                          |
| <i>CENPE</i>                  | <i>PIMREG</i>   | <i>KIF15</i>             |                           |                                    |                          |
| <i>CENPF</i>                  | <i>PKMYT1</i>   | <i>KIF20A</i>            |                           |                                    |                          |
| <i>CENPH</i>                  | <i>PLK1</i>     | <i>KIF23</i>             |                           |                                    |                          |
| <i>CENPM</i>                  | <i>PLK4</i>     | <i>KIF2C</i>             |                           |                                    |                          |
| <i>CENPP</i>                  | <i>POLQ</i>     | <i>KIF4A</i>             |                           |                                    |                          |
| <i>CENPU</i>                  | <i>POT1</i>     | <i>MELK</i>              |                           |                                    |                          |
| <i>CEP152</i>                 | <i>PIIF</i>     | <i>MKI67</i>             |                           |                                    |                          |
| <i>CEP55</i>                  | <i>PRC1</i>     | <i>NCAPG</i>             |                           |                                    |                          |
| <i>CIT</i>                    | <i>PSMC3IP</i>  | <i>NCAPG2</i>            |                           |                                    |                          |
| <i>CKAP2</i>                  | <i>PSRC1</i>    | <i>NUF2</i>              |                           |                                    |                          |
| <i>CKAP5</i>                  | <i>PTTG1</i>    | <i>NUSAP1</i>            |                           |                                    |                          |
| <i>CKS1B</i>                  | <i>RAD51</i>    | <i>PBK</i>               |                           |                                    |                          |
| <i>CKS2</i>                   | <i>RAD51AP1</i> | <i>PKMYT1</i>            |                           |                                    |                          |
| <i>CTSV</i>                   | <i>RAD54B</i>   | <i>POLQ</i>              |                           |                                    |                          |
| <i>DBF4</i>                   | <i>RAD54L</i>   | <i>PRC1</i>              |                           |                                    |                          |
| <i>DDIAS</i>                  | <i>RFC3</i>     | <i>PTTG1</i>             |                           |                                    |                          |
| <i>DEPDC1</i>                 | <i>RM12</i>     | <i>RAD54L</i>            |                           |                                    |                          |
| <i>DEPDC1B</i>                | <i>SHCBP1</i>   | <i>SPAG5</i>             |                           |                                    |                          |
| <i>DNA2</i>                   | <i>SKA1</i>     | <i>STMN1</i>             |                           |                                    |                          |
| <i>DNMT3B</i>                 | <i>SKA3</i>     | <i>TACC3</i>             |                           |                                    |                          |
| <i>DONSON</i>                 | <i>SPAG5</i>    | <i>TK1</i>               |                           |                                    |                          |
| <i>DSCC1</i>                  | <i>SPC25</i>    | <i>TOP2A</i>             |                           |                                    |                          |
| <i>EZH2</i>                   | <i>STIL</i>     | <i>TPX2</i>              |                           |                                    |                          |
| <i>FAM72D</i>                 | <i>STMN1</i>    | <i>UBE2T</i>             |                           |                                    |                          |
| <i>FAM83D</i>                 | <i>TACC3</i>    | <i>ZWINT</i>             |                           |                                    |                          |
| <i>FANCD2</i>                 | <i>TK1</i>      |                          |                           |                                    |                          |
| <i>FANCI</i>                  | <i>TOP2A</i>    |                          |                           |                                    |                          |
| <i>GINS1</i>                  | <i>TPX2</i>     |                          |                           |                                    |                          |
| <i>GINS2</i>                  | <i>TRIM59</i>   |                          |                           |                                    |                          |
| <i>GPC2</i>                   | <i>TUBA1B</i>   |                          |                           |                                    |                          |
| <i>GPSM2</i>                  | <i>UBE2S</i>    |                          |                           |                                    |                          |
| <i>GTSE1</i>                  | <i>UBE2T</i>    |                          |                           |                                    |                          |
| <i>HJURP</i>                  | <i>WDR62</i>    |                          |                           |                                    |                          |
| <i>HMGB2</i>                  | <i>WEE1</i>     |                          |                           |                                    |                          |
| <i>HMMR</i>                   | <i>ZGRF1</i>    |                          |                           |                                    |                          |
| <i>INSIG1</i>                 | <i>ZNF273</i>   |                          |                           |                                    |                          |
| <i>KIF11</i>                  | <i>ZNF695</i>   |                          |                           |                                    |                          |
| <i>KIF15</i>                  | <i>ZWINT</i>    |                          |                           |                                    |                          |

- a. The RRM2 signature consists of 126 genes. It was created by intersecting upregulated genes in PC-3-RRM2 cells with genes with expression that was positively correlated with RRM2 overexpression in The Cancer Genome Atlas, Kumar, and Stand Up To Cancer/Prostate Cancer Foundation cohorts.
- b. 50-gene panel consists of common genes between the RRM2 signature and the PCS1 signature genes.
- c. 14-gene panel consists of genes shared by PCS1 subtype and PAM50 classifiers.
- d. 12-gene panel consists of common genes in the RRM2 signature, PCS1 signature, and PAM50 classifier.
- e. 11-gene panel consists of genes in the RRM2 signature and those upregulated in enzalutamide-resistant circulating tumor cells (CTCs). CTC expression data derived from single-cell RNA-seq profiling of CTCs from patients with prostate cancer (GEO: GSE67980).
