# Supplementary material for: Ribonucleotide reductase small subunit M2 is a master driver of aggressive prostate cancer
Source: PubMed Central journal article supplement (PMC7400792; doi:10.1002/1878-0261.12706), 2020-05-31
Supplement: MOL2-14-1881-s006.pdf [file MOL2-14-1881-s006.pdf]

## Supplemental Figures

**Fig. S1.** Clinical significance of 11-gene signature in patient tissues. (A) Association between expression of the 11-gene signature with Gleason score (left) and lethality (right) in the Setlur cohort. (B) Clinical significance of 11-gene signature expression in the TCGA cohort. Samples were ranked based on expression of the 12-gene sub-signature, and Kaplan-Meier curves were used to estimate survival differences between patients in the top and bottom 25<sup>th</sup> percentiles of expression. The log-rank test was calculated to determine significance.

**Fig. S2.** Profiling of immune cells in *RRM2*-high and *RRM2*-low prostate cancer samples from the TCGA cohort. *RRM2* expression was used to categorize cases as *RRM2* high (upper quantile) and *RRM2* low (lower quantile), and CIBERSORT was used to profile immune cell populations using the LM22 signature. Significance was determined using Wilcoxon's rank sum test with Benjamini-Hochberg correction.

**Fig. S3.** Profiling of immune cells in *RRM2*-high and *RRM2*-low prostate cancer samples from the Taylor cohort. *RRM2* expression was used to categorize cases as *RRM2* high (upper quantile) and *RRM2* low (lower quantile), and CIBERSORT was used to profile immune cell populations using the LM22 signature. Significance was determined using Wilcoxon's rank sum test with Benjamini-Hochberg correction.

**Fig. S4.** Profiling of immune cells in *RRM2*-high and *RRM2*-low prostate cancer samples from the SU2C/PCF cohort. *RRM2* expression was used to categorize cases as *RRM2* high (upper quantile) and *RRM2* low (lower quantile), and CIBERSORT was used to profile immune cell populations using the LM22 signature. Significance was determined using Wilcoxon's rank sum test with Benjamini-Hochberg correction.
